# Supplementary material for: Synergistic effect in bimetallic copper–silver (CuxAg) nanoparticles enhances silicon conversion in Rochow reaction
Source: Royal Society of Chemistry journal article supplement (doi:10.1039/c5ra04575d), 2015-01-01
Supplement: c5ra04575d1.pdf [file c5ra04575d1.pdf]

## Supplementary Information

### Synergistic effect in bimetallic copper–silver

### (Cu<sub>x</sub>Ag) nanoparticles enhances silicon conversion in Rochow reaction

Zailei Zhang,<sup>\*a</sup> Yongjun Ji,<sup>a</sup> Jing Li,<sup>a</sup> Ziyi Zhong,<sup>b</sup> and Fabing Su<sup>\*a</sup>

<sup>a</sup> *State Key Laboratory of Multiphase Complex Systems, Institute of Process Engineering, Chinese Academy of Sciences, Beijing, China 100190,*

<sup>b</sup> *Institute of Chemical Engineering and Sciences, A\*star, 1 Pesek Road, Jurong Island, Singapore 627833*

\*Corresponding authors. E-mail address: zhangzl@ipe.ac.cn (Z. Zhang); fbsu@ipe.ac.cn (F. Su), Tel.: +86-10-82544850, Fax: +86-10-82544851.

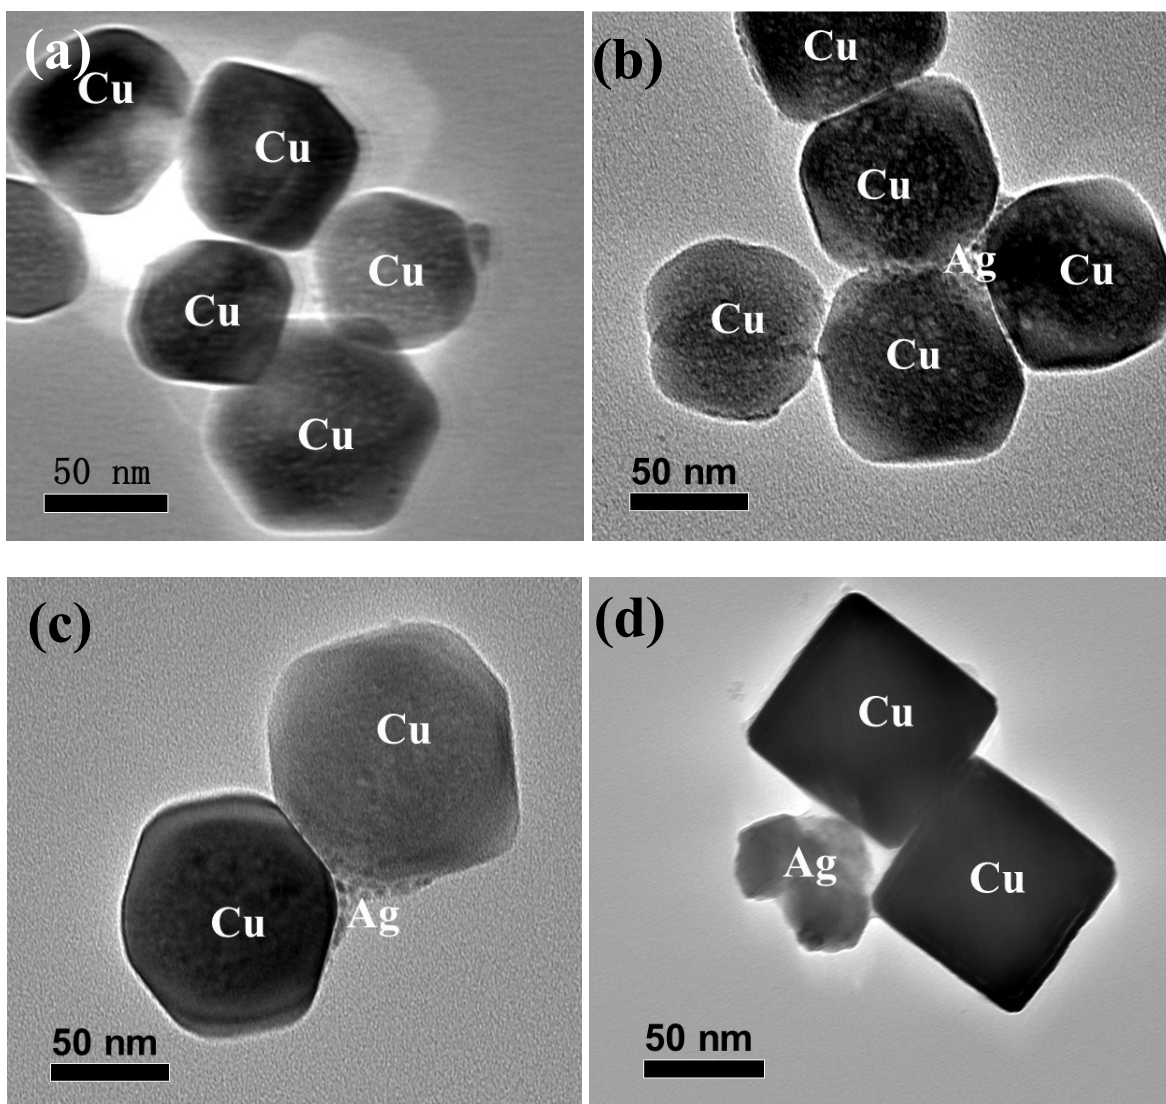

**Fig. S1** TEM images of  $\text{Cu}_{50}\text{-Ag}$  (a),  $\text{Cu}_{20}\text{-Ag}$  (b),  $\text{Cu}_{10}\text{-Ag}$  (c), and  $\text{Cu}_5\text{-Ag}$  (d) nanoparticles.

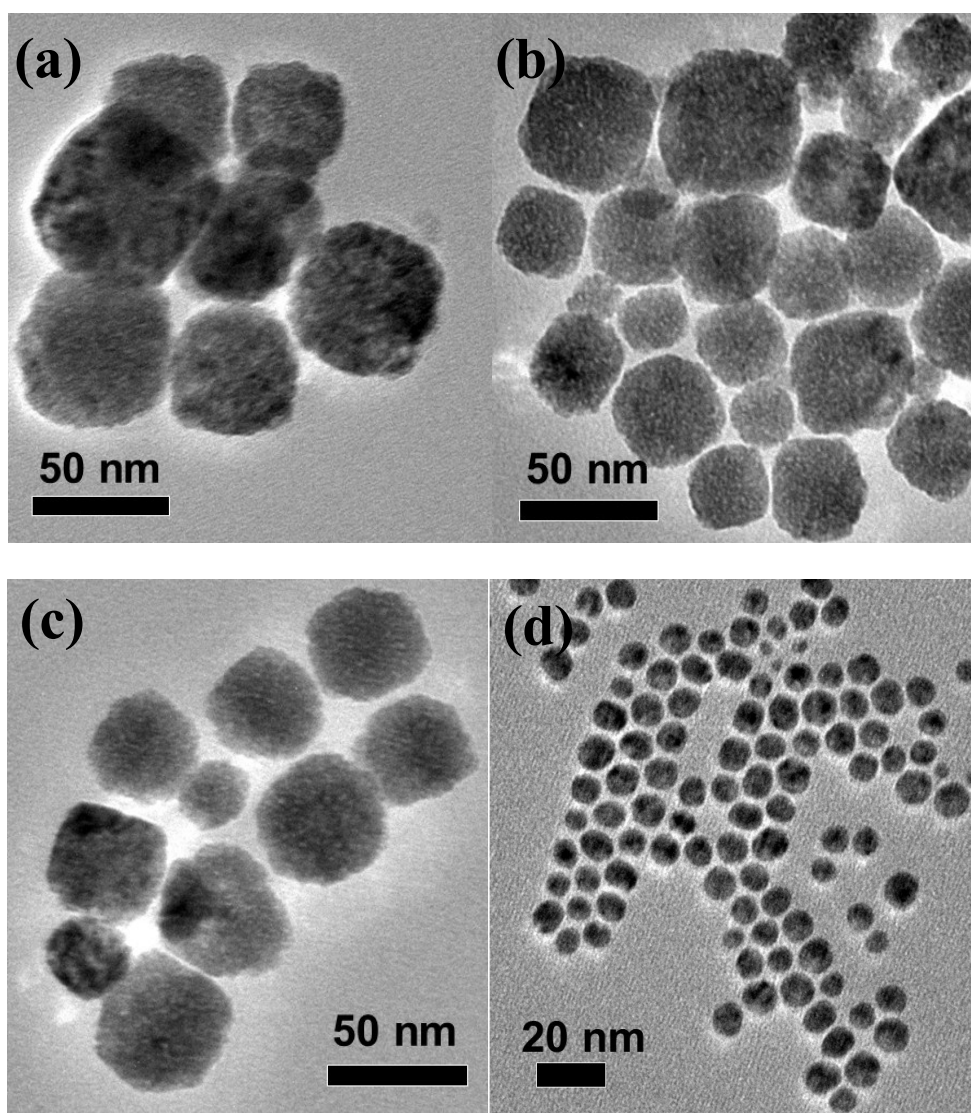

**Fig. S2** TEM image of  $\text{Cu}_{50}\text{Ag}$  (a),  $\text{Cu}_{20}\text{Ag}$  (b),  $\text{Cu}_{10}\text{Ag}$  (c), and  $\text{CuAg}_2$  (d) bimetallic nanoparticles.

TEM image of Fig. S3 shows that CuAg nanoparticles have a mean size of 2.8 nm and a standard deviation of 1.9 after reaction for 1.5 h at 180 °C.

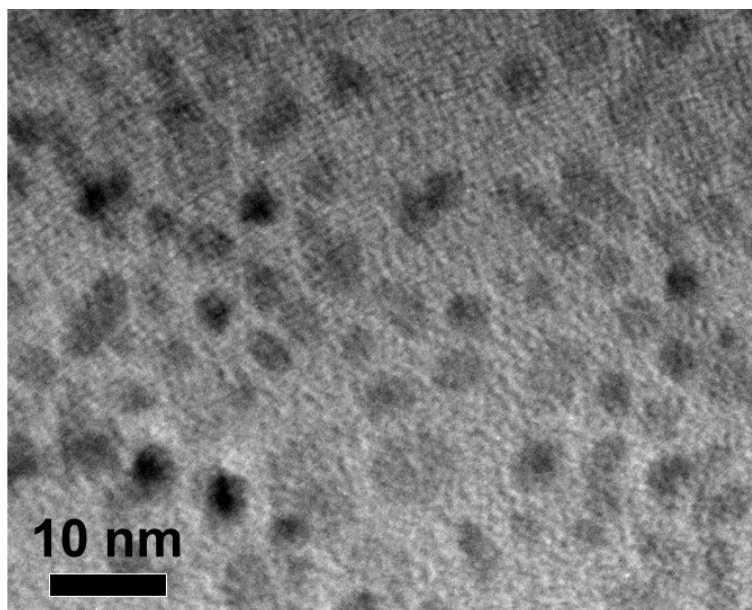

**Fig. S3** TEM image of CuAg nanoparticles after reaction for 1.5 h at 180 °C.
